# Supplementary material for: Ubiquitin ligase EL5 maintains the viability of root meristems by influencing cytokinin-mediated nitrogen effects in rice
Source: PubMed Central journal article supplement (PMC4036501; doi:10.1093/jxb/eru110), 2014-03-24
Supplement: supp_eru110_jexbot115568_file001.pdf [file supp_eru110_jexbot115568_file001.pdf]

Journal of Experimental Botany

**Ubiquitin ligase EL5 maintains the viability of root meristems by influencing cytokinin-mediated nitrogen effects in rice**

Susumu Mochizuki, Yusuke Jikumaru, Hidemitsu Nakamura, Hanae Koiwai, Keisuke Sasaki, Yuji Kamiya, Hiroaki Ichikawa, Eiichi Minami, Yoko Nishizawa

## Supporting Information

**Supplementary Table S1.** Oligonucleotide primers used in this work.

**Supplementary Table S2.** RAP-ID and Probe-ID list of the nitrogen-related genes shown in Fig. 2.

**Supplementary Fig. S1.** Inhibitory effect of nitrogen on crown root elongation in transgenic rice plants overexpressing *EL5*.

Length of the longest crown root of non-transformants (NT, white bars) and two independent transgenic lines overexpressing the wild-type *EL5* (gray bars) formed after 4 d under different concentrations of  $\text{KNO}_2$ . Values are averages ( $n = 22$  to  $23$  roots per treatment) with SD. Different letters above the bars indicate significant differences at  $P < 0.01$  (Tukey-Kramer test).

**Supplementary Fig. S2.** Effect of  $\text{KNO}_2$  treatment and *EL5* function on gene expression in whole roots.

(A) Values of the box-plot analysis shown in Fig. 2A.

(B, C) Heat maps with hierarchical clustering of the expression levels of up-regulated genes (group I) and down-regulated genes (group III) in untreated roots of transgenic rice plants overexpressing *EL5VI62A* (mEL5).

(D, E) Heat maps with hierarchical clustering of up-regulated genes (group IV) and down-regulated genes (group VI) in  $\text{KNO}_2$ -treated non-transformants (NT).

Magenta and green colors indicate up- and down-regulated expression, respectively. The color scale (representing the ratio of the average  $\log_2$  value to the same value of untreated NT) is shown at the bottom right.

**Supplementary Fig. S3.** Expression profiles of representative nitrogen-related genes.

Magenta and green colors indicate up- and down-regulated expression respectively. The color scale (representing the ratio of the average  $\log_2$  value to the same value of untreated non-transformants) is shown at the bottom. NT, non-transformants; mEL5, transgenic rice plants overexpressing *EL5VI62A*.

**Supplementary Fig. S4.** Expression profiles of representative pathogenesis-related genes.

Magenta and green colors indicate up- and down-regulated expression respectively. The color scale (representing the ratio of the average  $\log_2$  value to the same value of untreated non-transformants) is shown at the bottom right. NT, non-transformants; mEL5, transgenic rice plants overexpressing *EL5V162A*.

**Supplementary Fig. S5.** Expression profiles of representative photosynthesis-related genes.

Magenta and green colors indicate up- and down-regulated expression respectively. The color scale (representing the ratio of the average  $\log_2$  value to the same value of untreated non-transformants) is shown at the bottom. NT, non-transformants; mEL5, transgenic rice plants overexpressing *EL5V162A*.

**Supplementary Fig. S6.** Expression profiles of representative genes for biosynthesis, inactivation, and response of cytokinin.

Magenta and green colors indicate up- and down-regulated expression respectively. The color scale (representing the ratio of the average  $\log_2$  value to the same value of untreated non-transformants) is shown at the bottom. NT, non-transformants; mEL5, transgenic rice plants overexpressing *EL5V162A*.

**Supplementary Fig. S7.** Effect of cytokinin on browning at lateral root emergence sites (LRES).

(A) Dose-dependency of cytokinin-induced LRES browning. Roots were grown for 4 d without nitrogen sources and then treated with different concentrations of iP for 2 d.

(B) Effect of cytokinin on nitrite-induced LRES browning in non-transformants (NT). Roots were grown for 4 d without nitrogen sources and then treated with 200  $\mu$ M tZ or iP with or without 5 mM  $\text{KNO}_2$  for 3 d.

Values are averages ( $n = 40$  shoots per treatment) with SD. White bars, NT; gray bars, transgenic rice plants overexpressing *EL5V162A* (mEL5). Different letters above the bars indicate significant differences at  $P < 0.01$  (Tukey-Kramer test with inverse sine transformation).

**Supplementary Fig. S8.** Accumulation of NO after nitrite treatment.

(A) NO accumulation after  $\text{KNO}_2$  treatment in non-transformants (NT, white bars) and transgenic rice plants overexpressing *EL5VI62A* (mEL5, gray bars). Roots from 10 shoots per bottle were grown for 4 d without nitrogen sources, and then 10  $\mu\text{L}$  DAF2-DA solution ( $1.82 \text{ g L}^{-1}$  in DMSO) was added simultaneously with or without 5 mM  $\text{KNO}_2$  for 1 d. Quantities of DAF2-T fluorescence in 100  $\mu\text{L}$  culture medium from three independent bottles were measured, and average strength of fluorescence is presented. Error bars indicate SD. Different letters above the bars indicate significant differences at  $P < 0.01$  (Tukey-Kramer test with inverse sine transformation).

(B) NO accumulation at lateral root emergence sites (LRES) after  $\text{KNO}_2$  treatment. Typical confocal micrographs of DAF2-T fluorescence at the LRES are presented with each bright field image. Roots were grown for 4 d without nitrogen sources and then treated with or without 1 mM  $\text{KNO}_2$  for 1 d with DAF2-DA (final concentration  $0.182 \text{ mg L}^{-1}$ ). The fluorescence-field panels are confocal images composed of stacked Z-series images. Scale bars = 100  $\mu\text{m}$ . Images were observed by TCS SP5 confocal microscope (Leica, Wetzlar, Germany). DAF2-T fluorescence was excited at 488-nm, and detected at 500–540 nm. Images were processed and arranged by LAS AF software (Leica), MetaMorph software (Molecular Devices, Inc., Sunnyvale, CA), and Photoshop CS4 (Adobe, San Jose, CA).

**Supplementary Fig. S9.** Expression profiles of representative abscisic acid (ABA)-related genes.

Magenta and green colors indicate up- and down-regulated expression respectively. The color scale (representing the ratio of the average  $\log_2$  value to the same value of untreated non-transformant) is shown at the bottom. NT, non-transformants; mEL5, transgenic rice plants overexpressing *EL5VI62A*.

**Supplementary Table S1.** Oligonucleotide primers used in this work.

| Primer name                                                       | Sequence (5' to 3')       | Target gene (GenBank ID)         |
|-------------------------------------------------------------------|---------------------------|----------------------------------|
| <b><u>Primers for qRT-PCR</u></b>                                 |                           |                                  |
| <i>EL5</i> -QRT-FW4                                               | GCGAGGTCGTCAAGTATTATAAGG  | <i>EL5</i> (AB045120)            |
| <i>EL5</i> -QRT-RV4                                               | CCATCCATACATTTCTCTTTGCTAC |                                  |
| <i>rub1</i> -sense                                                | CCAGTAAGTCCTCAGCCATGGAG   | <i>UBQ</i> (ubiquitin; AK121590) |
| <i>rub1</i> -antisense                                            | GGACACAATGATTAGGGAATCAC   |                                  |
| <b><u>Primers for construction of <i>EL5p-GUS</i> plasmid</u></b> |                           |                                  |
| <i>EL5p</i> -sense                                                | GCAAATAGGGTCTCTCGTTAGC    | <i>EL5</i> promoter fragment     |
| <i>EL5p</i> -antisense                                            | GACGAAGACTCGTCCATGGC      |                                  |

**Supplementary Table S2.** RAP-ID and Probe-ID list of the nitrogen-related genes shown in Fig. 2.

| Genes             | RAP-ID                         | Probe-ID                                           |
|-------------------|--------------------------------|----------------------------------------------------|
| <i>OsNRT1.1</i>   | Os03g0235900                   | Os03g0235900 mRNA AF140606 CDS+3'UTR               |
| <i>OsNAR2.1</i>   | Os02g0595900                   | Os02g0595900 COMBINER_EST CI554982 0               |
| <i>OsNAR2.2</i>   | Os04g0480200                   | Os04g0480200 mRNA AK109571 CDS+3'UTR               |
| <i>OsNRT2.1</i>   | Os02g0112100                   | Os02g0112100 mRNA AB008519 CDS+3'UTR               |
| <i>OsNRT2.2</i>   | Os02g0112600                   | Os02g0112600 mRNA AK109733 CDS+3'UTR               |
| <i>OsNRT2.3</i>   | Os01g0704100                   | Os01g0704100 mRNA AK109776 CDS+3'UTR               |
| <i>OsNia1.1</i>   | Os08g0468100                   | Os08g0468100 mRNA AK101662 CDS+3'UTR               |
| <i>OsNia1.2</i>   | Os08g0468700                   | Os08g0468700 COMBINER_EST CI196459 6               |
| <i>OsNia2</i>     | Os02g0770800                   | Os02g0770800 mRNA AK102178 CDS+3'UTR               |
| <i>OsNiR1.1</i>   | Os01g0357100                   | Os01g0357100 mRNA AK061893 CDS+3'UTR               |
| <i>OsNiR1.2</i>   | Os02g0765900                   | Os02g0765900 COMBINER_EST CI138324 6               |
| <i>EL5</i>        | Os02g0559800<br>– Os02g0561800 | Os02g0559800 mRNA AB045120 CDS+3'UTR <sup>1)</sup> |
| <i>ORYsaGLB1a</i> | Os03g0233900                   | Os03g0233900 mRNA AK064054 CDS+3'UTR               |
| <i>ORYsaGLB1c</i> | Os03g0234000                   | Os03g0234000 COMBINER_EST Os03g0234000 8           |
| <i>OsNIGT1</i>    | Os02g0325600                   | Os02g0325600 mRNA AK101809 CDS+3'UTR               |
| <i>OsNIGTL1</i>   | Os03g0764600                   | Os03g0764600 mRNA AK105625 CDS+3'UTR               |
| <i>OsNIGTL2</i>   | Os07g0119300                   | Os07g0119300 mRNA AK070421 CDS+3'UTR               |
| <i>OsNIGTL3</i>   | Os12g0586300                   | Os12g0586300 COMBINER_EST Os12g0586300 8           |
| <i>OsNLP</i>      | Os02g0136000                   | Os02g0136000 COMBINER_EST CI549716 3               |
| <i>Os-LBD37</i>   | Os03g0445700                   | Os03g0445700 mRNA AK071624 CDS+3'UTR               |
| <i>Os-LBD38</i>   | Os07g0589000                   | Os07g0589000 mRNA AK069813 CDS+3'UTR               |
| <i>Os-LBD39</i>   | Os03g0609500                   | Os03g0609500 COMBINER_EST CI261705 6               |

1) This probe can hybridize to the 3'UTR region (148-bp from the 3' end of the coding sequence) of mRNA, which is transcribed from 6 copies of rice genes (Os02g0559800 to Os02g0561800).

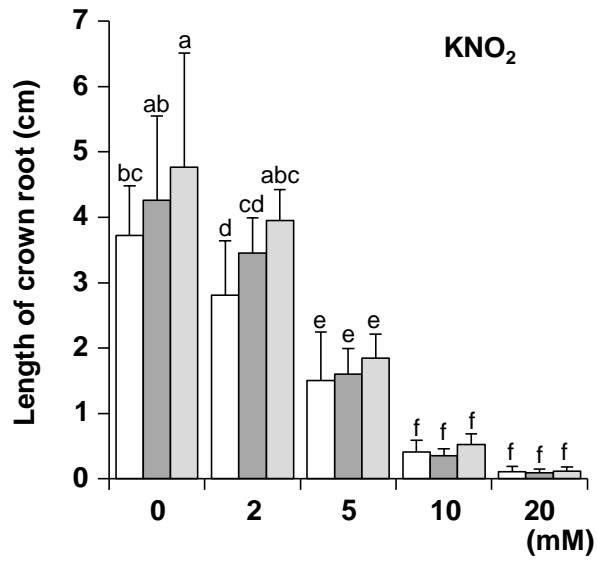

**Figure S1**

**A**

|                         |                   | Genotype (treatment)    | N     | Average  | SD      | Min      | 10%      | 25%      | Median   | 75%      | 90%      | Max     | 75%-25% |
|-------------------------|-------------------|-------------------------|-------|----------|---------|----------|----------|----------|----------|----------|----------|---------|---------|
| All genes               |                   | NT(KNO <sub>2</sub> )   | 17003 | -0.04850 | 0.00602 | -6.05327 | -0.85608 | -0.49241 | -0.14233 | 0.33762  | 0.80579  | 7.78790 | 0.83003 |
|                         |                   | mEL5(mock)              | 17003 | -0.00032 | 0.00602 | -3.90720 | -0.78173 | -0.40755 | -0.03281 | 0.39869  | 0.78713  | 6.40276 | 0.80624 |
|                         |                   | mEL5(KNO <sub>2</sub> ) | 17003 | -0.02660 | 0.00602 | -6.05654 | -1.04595 | -0.53804 | -0.06921 | 0.47090  | 0.93821  | 8.41384 | 1.00894 |
| mEL5 (mock)             | +1.0 ≤ (I)        | NT(KNO <sub>2</sub> )   | 1084  | 0.82540  | 0.02383 | -3.87858 | -0.79610 | -0.15314 | 0.58852  | 1.58829  | 2.77305  | 7.78790 | 1.74143 |
|                         |                   | mEL5(KNO <sub>2</sub> ) | 1084  | 1.79530  | 0.02383 | -3.27832 | 0.38527  | 0.94482  | 1.57090  | 2.49804  | 3.54988  | 8.41384 | 1.55322 |
|                         | -1.0 to +1.0 (II) | NT(KNO <sub>2</sub> )   | 14859 | -0.05520 | 0.00644 | -6.05327 | -0.75613 | -0.45136 | -0.12771 | 0.31880  | 0.72655  | 7.03442 | 0.77016 |
|                         |                   | mEL5(KNO <sub>2</sub> ) | 14859 | -0.03170 | 0.00644 | -4.14735 | -0.83143 | -0.47426 | -0.06321 | 0.41490  | 0.78276  | 4.98417 | 0.88916 |
|                         | ≤ -1.0 (III)      | NT(KNO <sub>2</sub> )   | 1060  | -0.84880 | 0.02410 | -4.28122 | -1.66908 | -1.22111 | -0.82279 | -0.46328 | -0.10256 | 3.13055 | 0.75783 |
|                         |                   | mEL5(KNO <sub>2</sub> ) | 1060  | -1.81770 | 0.02410 | -6.05654 | -2.89847 | -2.23606 | -1.64985 | -1.28225 | -1.01272 | 3.35848 | 0.95381 |
| NT ( KNO <sub>2</sub> ) | +1.0 ≤ (IV)       | mEL5(mock)              | 1148  | 0.97070  | 0.02316 | -2.68527 | 0.06895  | 0.40675  | 0.74568  | 1.35755  | 2.19755  | 6.40276 | 0.95080 |
|                         |                   | mEL5(KNO <sub>2</sub> ) | 1148  | 1.57590  | 0.02316 | -2.65615 | 0.35494  | 0.74063  | 1.22557  | 2.17110  | 3.40818  | 8.41384 | 1.43047 |
|                         | -1.0 to +1.0 (V)  | mEL5(mock)              | 14688 | -0.02050 | 0.00648 | -3.89922 | -0.70011 | -0.38762 | -0.04644 | 0.35287  | 0.68903  | 4.36952 | 0.74049 |
|                         |                   | mEL5(KNO <sub>2</sub> ) | 14688 | -0.05190 | 0.00648 | -3.97613 | -0.88220 | -0.48810 | -0.07618 | 0.40600  | 0.78343  | 4.53773 | 0.89410 |
|                         | ≤ -1.0 (VI)       | mEL5(mock)              | 1167  | -0.70180 | 0.02297 | -3.90720 | -2.10099 | -1.23904 | -0.68503 | -0.15941 | 0.56429  | 3.20129 | 1.07963 |
|                         |                   | mEL5(KNO <sub>2</sub> ) | 1167  | -1.28490 | 0.02297 | -6.05654 | -2.71745 | -1.80970 | -1.21681 | -0.74917 | -0.06232 | 3.45849 | 1.06053 |

**B**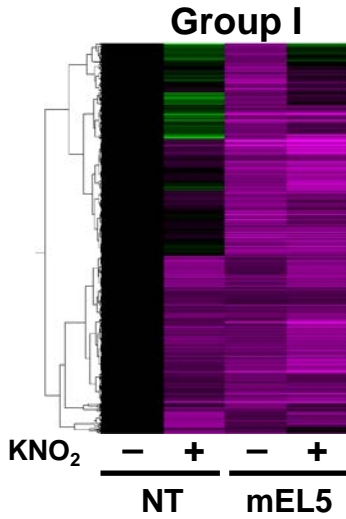**C**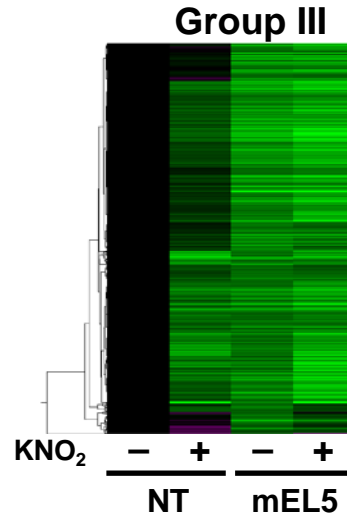**D**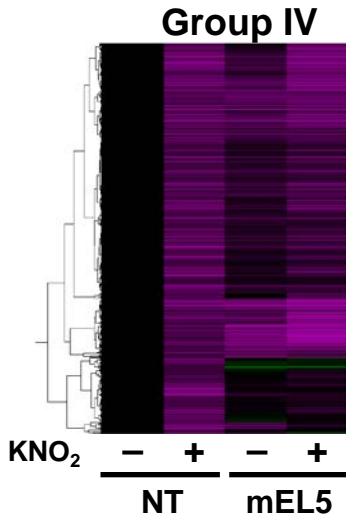**E**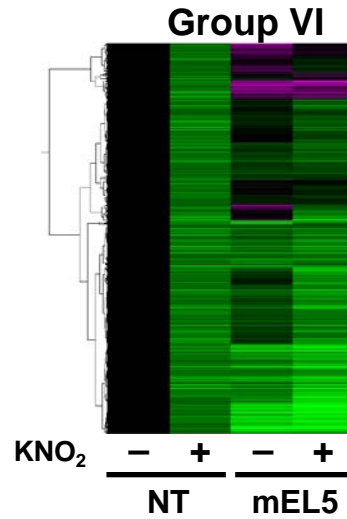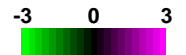



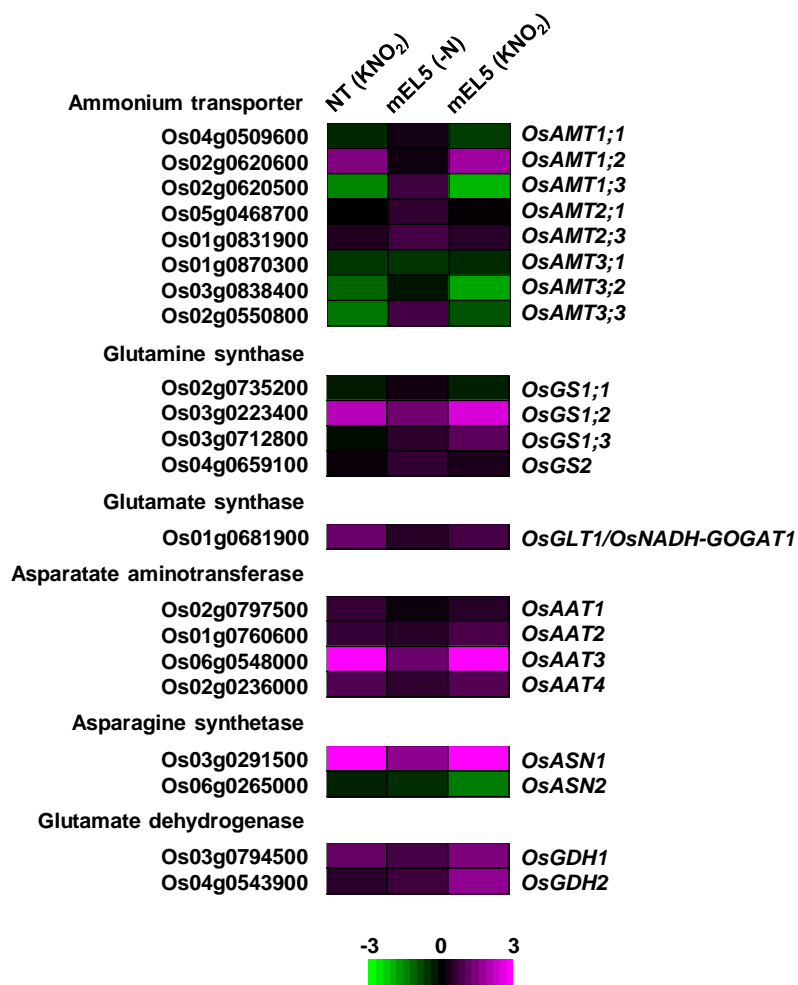

**Figure S3**

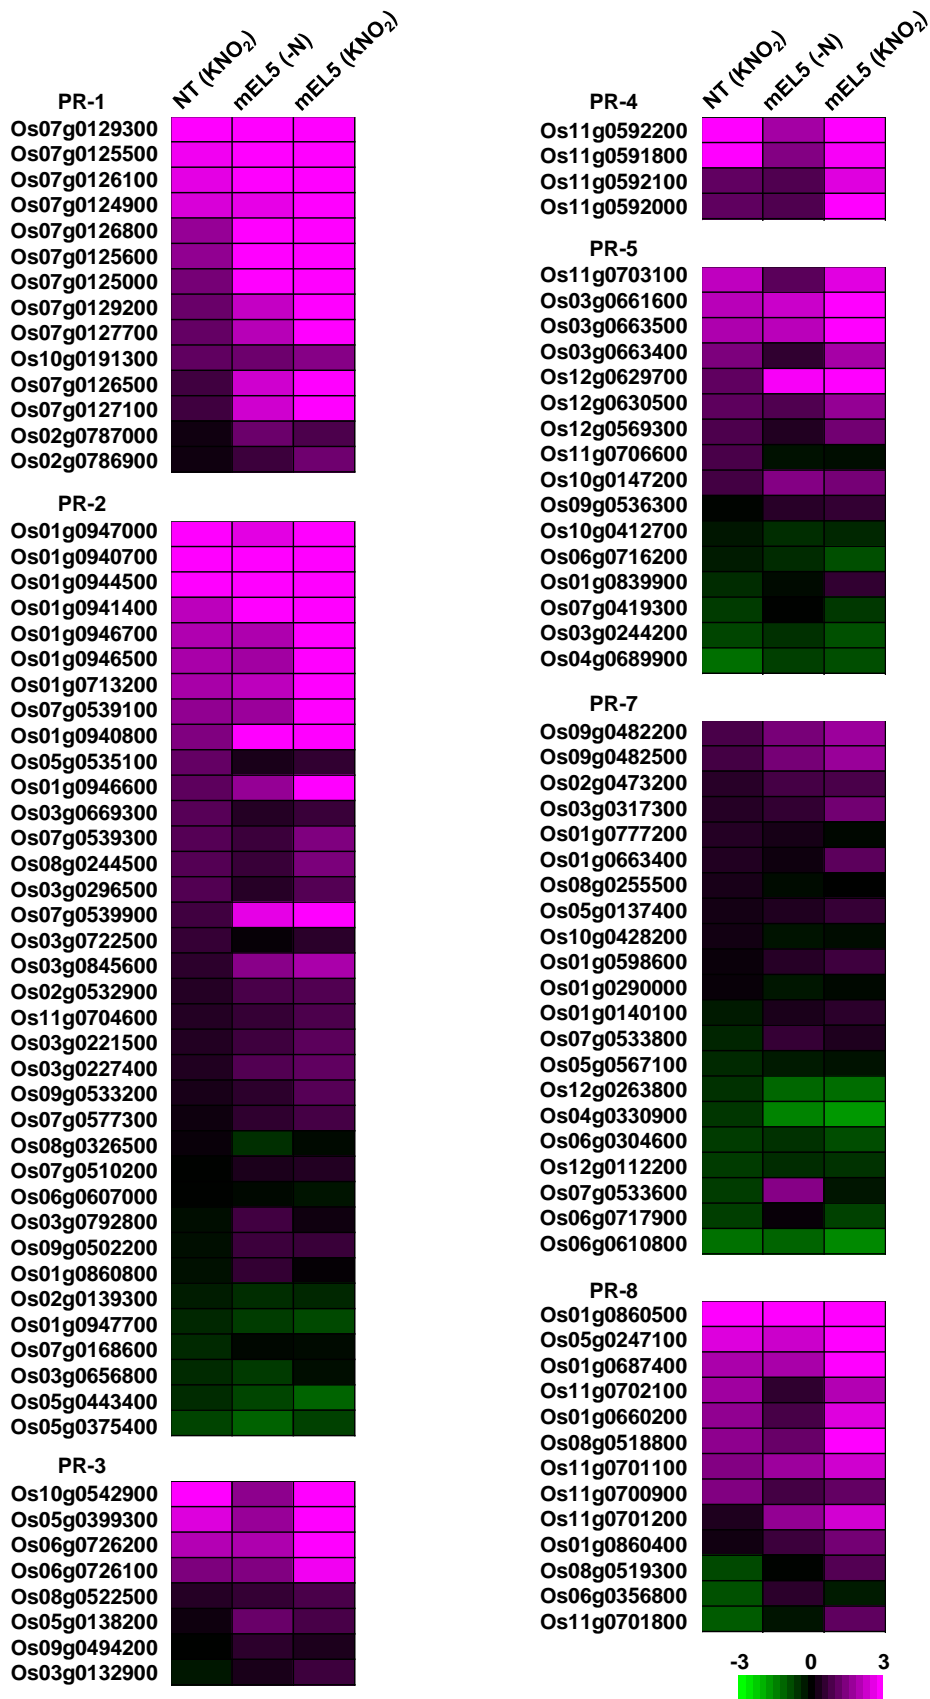

Figure S4

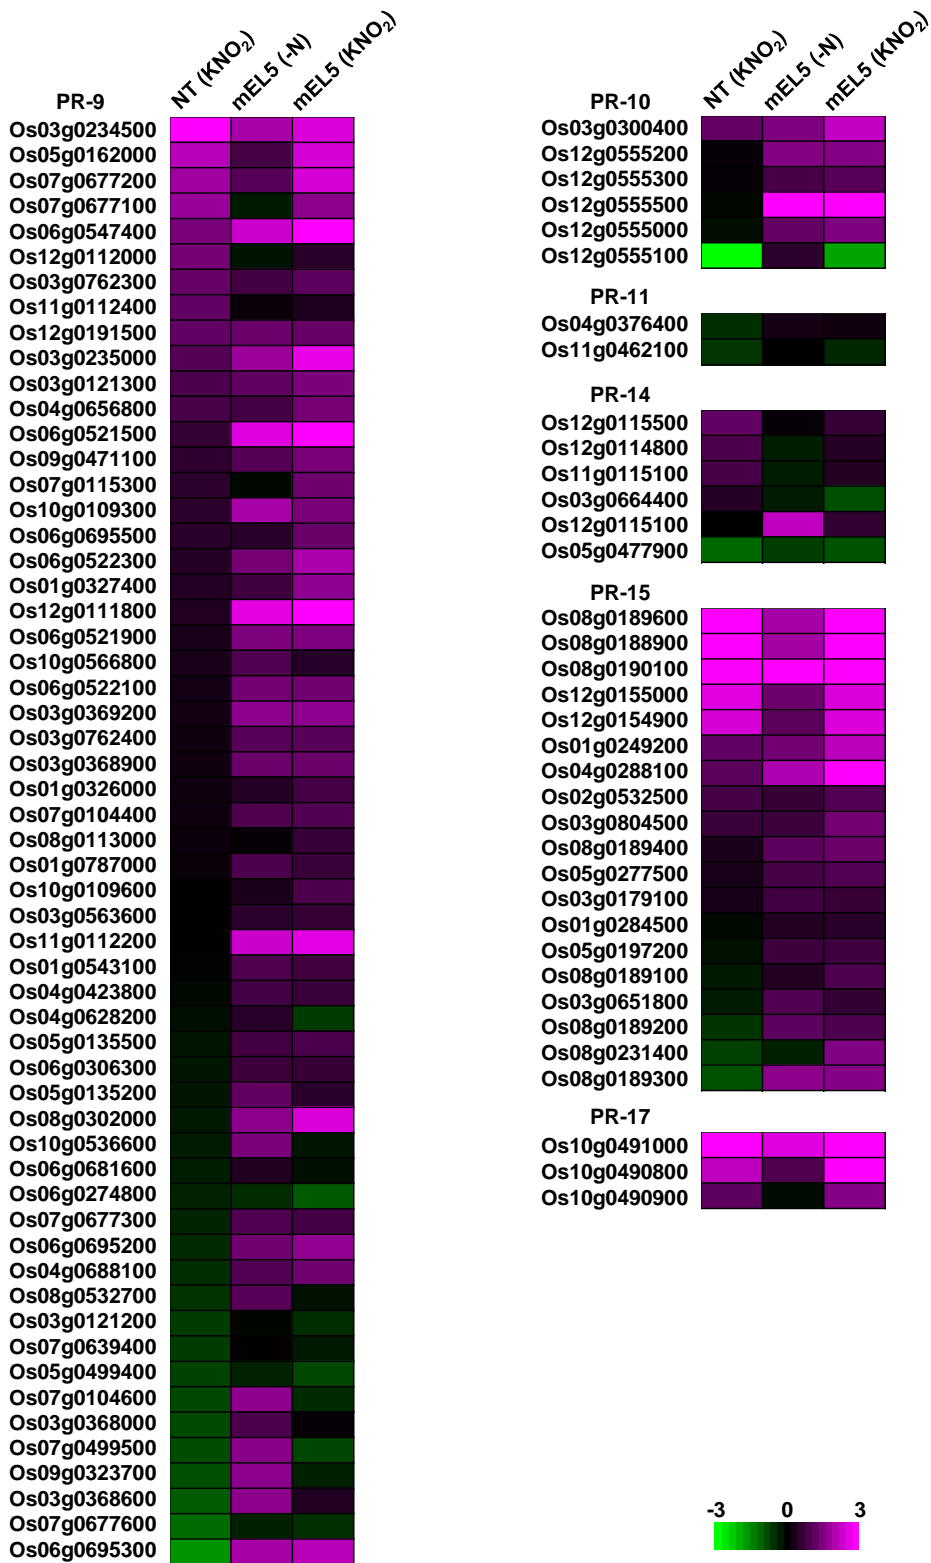

Figure S4 (continued)

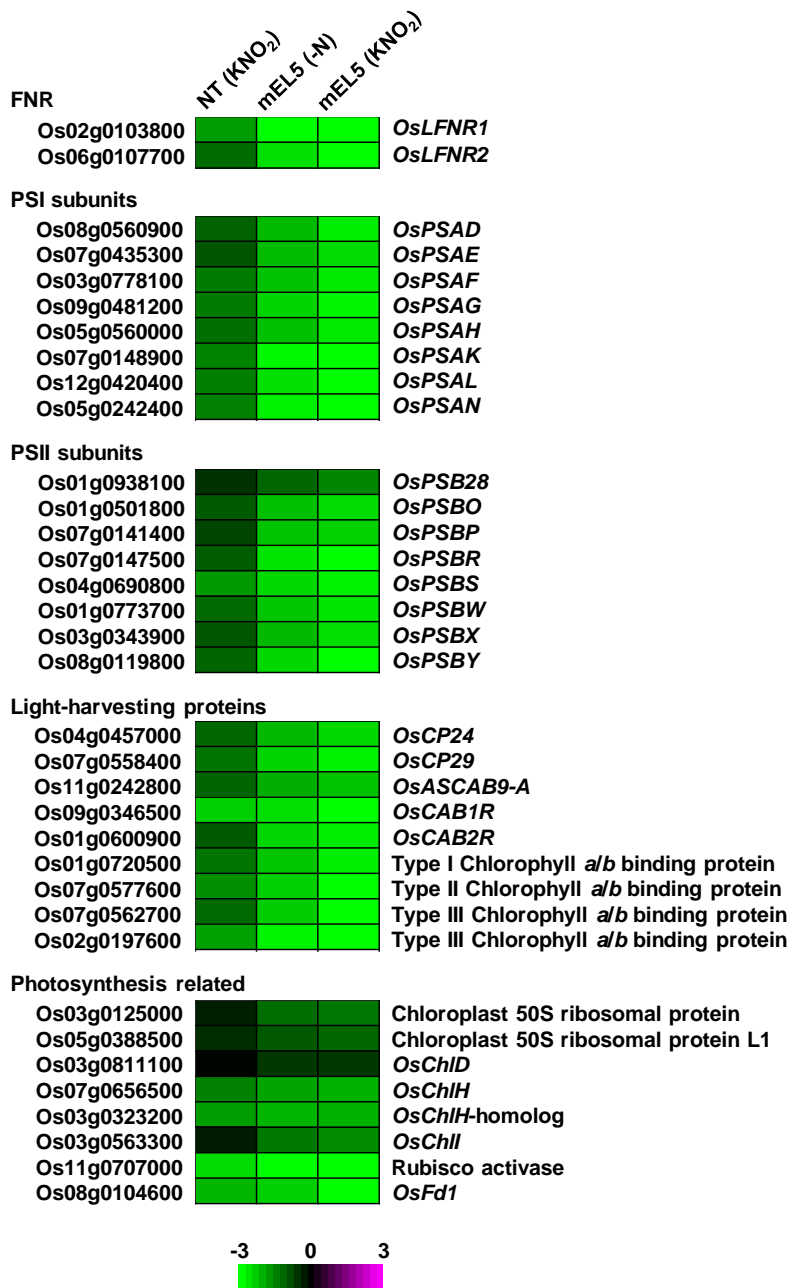

Figure S5

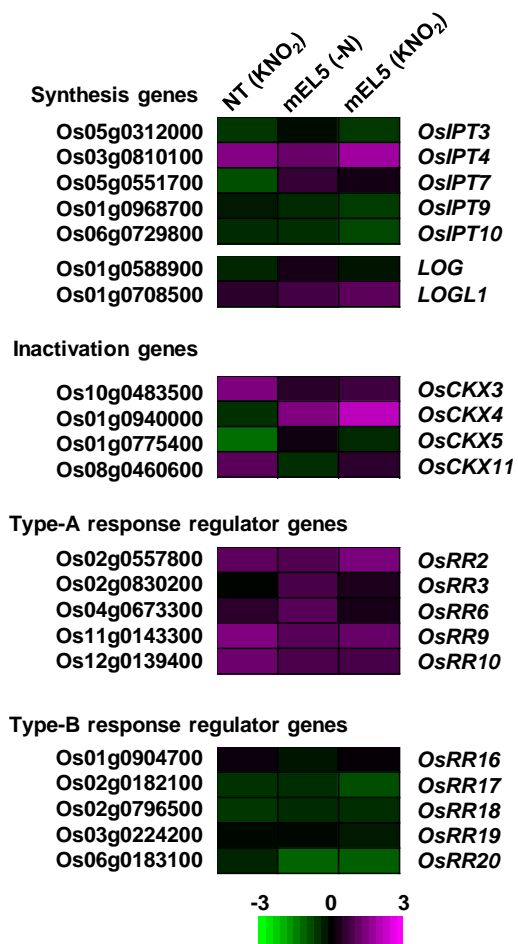

Figure S6

**A**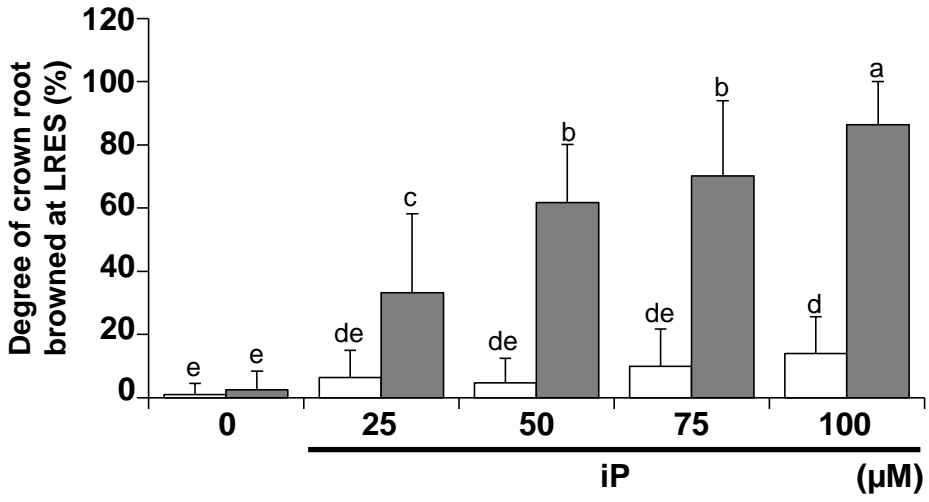**B**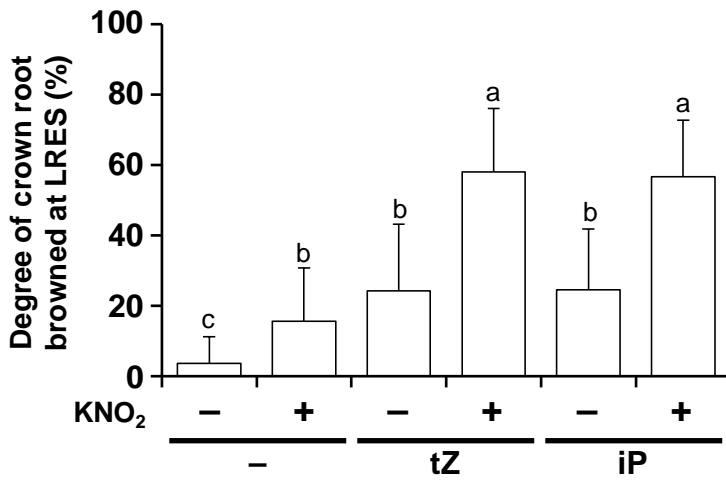

**A**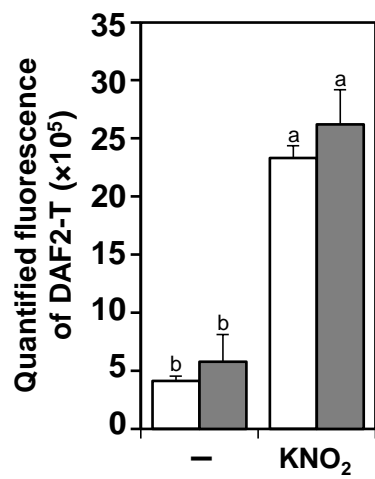**B**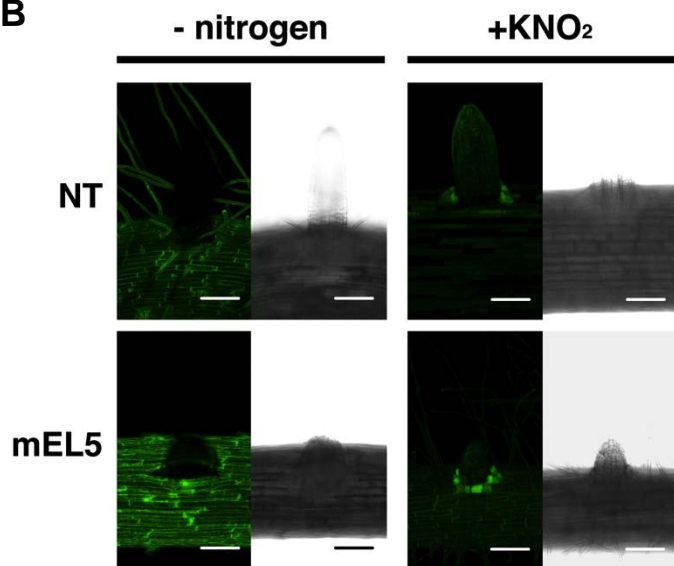

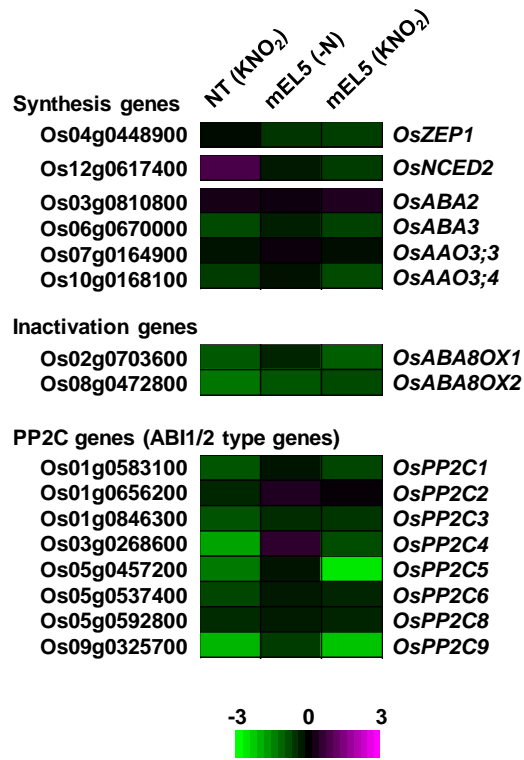

Figure S9
